# Supplementary material
Source: Springer Nature journal article supplement (https://www.springermedizin.de/resource/supplementary/12958_2007_419_MOESM9_ESM.pdf/9567838)

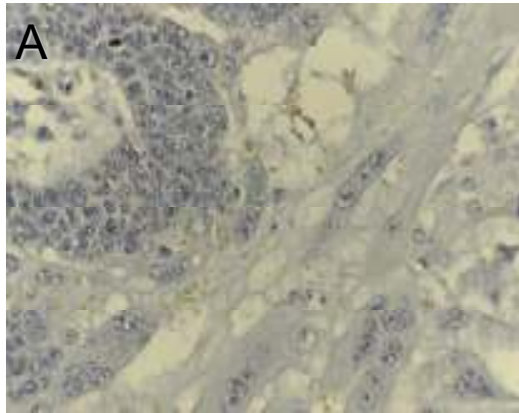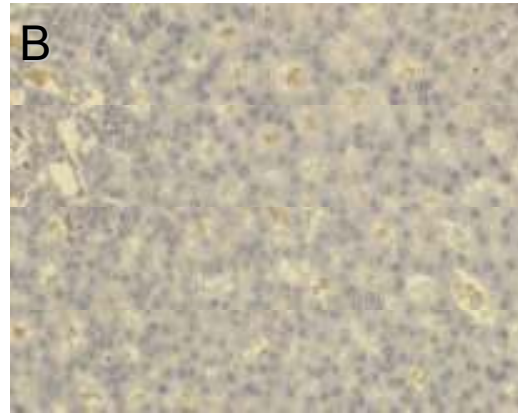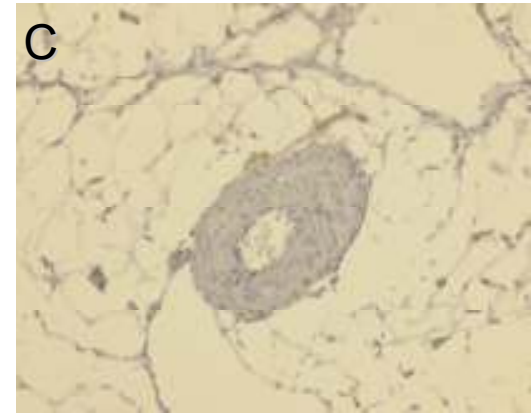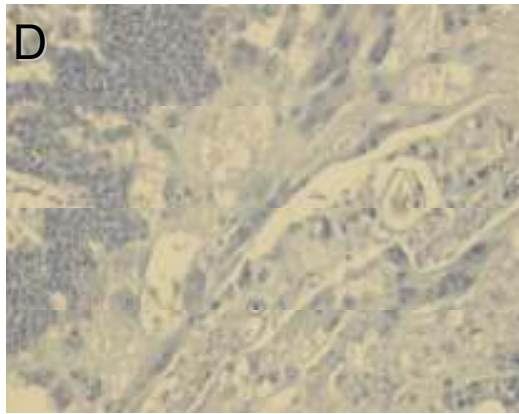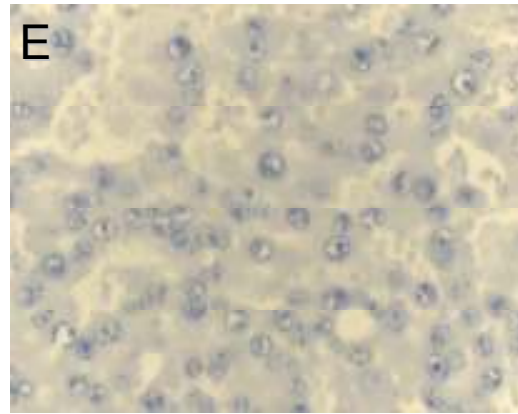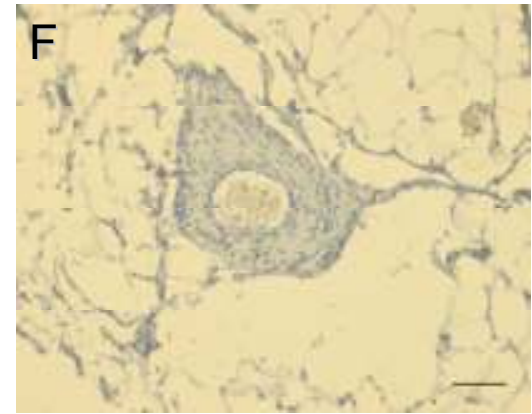

Supplement: MOESM9 [file 9567838]
